# Supplementary material for: Co-regulated gene expression of splicing factors as drivers of cancer progression
Source: PubMed Central journal article supplement (PMC6445126; doi:10.1038/s41598-019-40759-4), 2019-04-02

# **Co-regulated gene expression of splicing factors as drivers of cancer progression**

Esmee Koedoot<sup>1</sup>, Marcel Smid<sup>2</sup>, John A. Foekens<sup>2</sup>, John W.M. Martens<sup>2</sup>, Sylvia E. Le Dévédec<sup>1</sup>, Bob van de Water<sup>1,3</sup>

<sup>1</sup> Division of Drug Discovery and Safety, LACDR, Leiden University, the Netherlands

<sup>2</sup> Department of Medical Oncology and Cancer Genomics Netherlands, Erasmus MC Cancer Institute, Erasmus University Medical Center, Rotterdam, the Netherlands

<sup>3</sup> To whom correspondence should be addressed

<sup>3</sup>Address of correspondence:

Bob van de Water  
Division of Drug Discovery and Safety  
Leiden Academic Centre for Drug Research  
Leiden University  
2300 RA Leiden  
The Netherlands  
Tel: +31-71-5276223  
Fax: +31-71-5274277  
b.water@lacdr.leidenuniv.nl

Running Title: Co-regulated expression of splicing factors in cancer

## Supplementary Figure Legends

**Supplementary Figure 1.** Change in splicing factor RNA expression levels comparing normal, tumor tissue and metastatic tissue. **A)** Unsupervised clustering of log2 fold change in splicing factor expression levels comparing tumor to normal tissue (n = 116, Euclidean distance, complete linkage). **B)** Unsupervised clustering of log2 fold change in splicing factor expression levels comparing tumor to metastatic tissue (n = 7, Euclidean distance, complete linkage).

**Supplementary Figure 2.** Unsupervised clustering of PC of splicing factor RNA expression levels. **A)** Unsupervised clustering (Euclidean distance, complete linkage) of the PC of splicing factor RNA expression levels based on TCGA RNA sequencing data as in Fig. 1J, displaying all splicing factors. **B)** Unsupervised clustering (Euclidean distance, complete linkage) of the PC of splicing factor RNA expression levels based on BASIS RNA sequencing data as in Fig. 1K, displaying all splicing factors.

**Supplemental Figure 3.** TCGA cluster correlations. **A)** Hierarchical clustering (Euclidean distance, complete linkage) of the correlation of splicing factor expression levels in TCGA RNA sequencing data (red = high positive correlation, green = high negative correlation). Similar clustering as in Figure 1J, but now with all clusters numbered. **(B-G)** Hierarchical clustering (Euclidean distance, complete linkage) of the correlation of splicing factor expression levels of all cluster combinations shown in figure A.

**Supplementary Figure 4.** Pearson Correlation of RNA expression levels of cluster 1 and cluster 2 splicing factors in 867 primary breast tumors of untreated patients (MA-867).

**Supplementary Figure 5.** Distribution of cluster 1 and 2 splicing factors over different spliceosome sub-complexes. **A)** Cluster 1 splicing factor distribution over core and non-core categories. **B)** Same as in A but now for Cluster 2 splicing factors. **C)** Cluster 1 splicing factor



distribution over different spliceosomal sub-complexes. **D)** Same as in C, but now for Cluster 2 splicing factors.

**Supplementary Figure 6.** High cluster 2 splicing factor expression levels are related to a more aggressive breast tumor phenotype. **A)** Unsupervised clustering SF RNA expression in primary breast tumors of BASIS RNA sequencing data, annotated with known driver gene mutations. SF levels were first log<sub>2</sub> normalized. Next median patient levels were equalized to 0 per SF. **B)** Log<sub>2</sub> fold change in expression of cluster 1 and cluster 2 splicing factors comparing ER negative to ER positive primary breast tumors using the TCGA RNA sequencing dataset **C)** Hierarchical clustering of SF expression levels in primary breast tumors of TCGA RNA sequencing data. SF levels were first log<sub>2</sub> normalized, followed by equalizing median patient levels to 0 per SF. **D)** Cluster 1 and cluster 2 splicing factor expression levels in primary breast tumors with different pleomorphism scores. Per SF, fold changes were calculated compared to score 1. **E)** Cluster 1 and cluster 2 splicing factor expression in PAM50 breast cancer subtypes. Groups are compared using a student's t-test. \* P<0.05, \*\* P<0.01, \*\*\*P<0.001.

**Supplementary Figure 7.** Log<sub>2</sub> difference in cluster 1 and 2 expression levels comparing **A)** primary tumor tissue with normal tissue and **B)** primary tumor tissue with metastatic tissue. Dots represent different patients.

**Supplementary Figure 8. A)** Association of the expression of cluster 1 and cluster 2 splicing factors with breast cancer overall survival. Per patient, mean expression of all factors within one cluster was calculated. Based on this mean expression, the patient cohort was median-split in low and high expression of cluster 1 or 2 splicing factors and survival curves for overall survival, relapse-free survival and metastasis-free survival were generated. Breast cancer survival curves of cluster 1 and cluster 2 splicing factors in estrogen receptor (ER) negative **(B)** and ER positive **(C)** subtypes. Per patient, mean expression of all factors within

one cluster was calculated. Based on this mean expression, the patient cohort was median-split in low and high expression of cluster 1 or 2 splicing factors and survival curves for overall survival, relapse-free survival and metastasis-free survival were generated. **D)** Hazard ratio (HR) for distant metastasis formation for cluster 1 and cluster 2 splicing factors in all (left) and estrogen receptor (ER) positive (right) tumors in the MA-867 dataset.

**Supplementary Figure 9. A)** Examples of expression levels of multiple isoforms of one gene in human breast cancer patient primary tumor RNA sequencing data. **B)** Density plot of difference in isoform length comparing cluster 1 and cluster 2 isoforms of the same gene. The length of the isoform in cluster 2 was subtracted from the length of the same gene isoform in cluster 1. Isoform clusters are based on Figure 4B. **C)** PCs of SMAD3 isoforms with Suppressor-SF DHX9 and Enhancer-SF FAM50A. **D)** Same as in C, but for NFKB2 isoforms. **E)** Same as in C, but for MCL1 isoforms. **F)** Same as in C, but for HNRNPA1 isoforms.

**Supplementary Figure 10.** Zoom in of isoform splicing factor clustering in Fig. 4B.

**Supplementary Figure 11.** Unsupervised clustering (Euclidean distance, complete linkage) of PC of Suppressor- and Enhancer-SFs with genes known to be involved in different stages or regulatory pathways of cell cycle. Red = highly positively correlated, green = highly negatively correlated.

**Supplementary Figure 12.** Transcription factors ATF1 and CREB1 can bind promoter regions of Suppressor-SFs but not Enhancer-SFs. **A)** Transcription binding site enrichment for splicing factors in promoter regions of Enhancer- and Suppressor-SFs. **B)** Expression levels of ATF1, CREB1 and CREM in High-Suppressor Low-Enhancer and Low-Suppressor High-Enhancer primary breast tumors. **C)** Unsupervised clustering (Euclidean distance,

complete linkage) of PCs of CREB1, ATF1 and CREM with Suppressor- and Enhancer-SFs. Red = highly positively correlated, green = highly negatively correlated.

**Supplementary Figure 13.** Hierarchical clustering (Euclidean distance, complete linkage) of PCs of Suppressor- and Enhancer-SFs in different cancer types. Red = highly positively correlated, green = highly negatively correlated.

**Supplementary Figure 14.** Hierarchical clustering (Euclidean distance, complete linkage) of Suppressor- and Enhancer-SF PCs to genes involved in mitochondrial translation, cell cycle, M phase and respiratory electron transport in breast cancer, lung cancer, pancreas cancer and prostate cancer. Red = highly positively correlated, green = highly negatively correlated.

**Supplementary Figure 15.** Enhancer- and Suppressor-SF expression levels related to overall survival, post-progression survival and progression-free survival in ovarian cancer. Per ovarian cancer patient, mean expression of all Suppressor- and Enhancer-SFs was calculated. Based on these expression levels, the patient cohort was median-split and overall and post-progression survival plots were generated<sup>25</sup>.

**Supplementary Figure 16.** RNA-protein spearman correlations of splicing factors. RNA sequencing data was derived from TCGA, protein expression data was derived from Mertins et al<sup>34</sup>.

**Supplementary Figure 17.** Correlation of log2 fold change of splicing factor expression comparing normal to tumor tissue with 1) the non-GLM method using normalized counts data provided by the TCGA portal and 2) using raw sequencing counts and a GLM method.

A

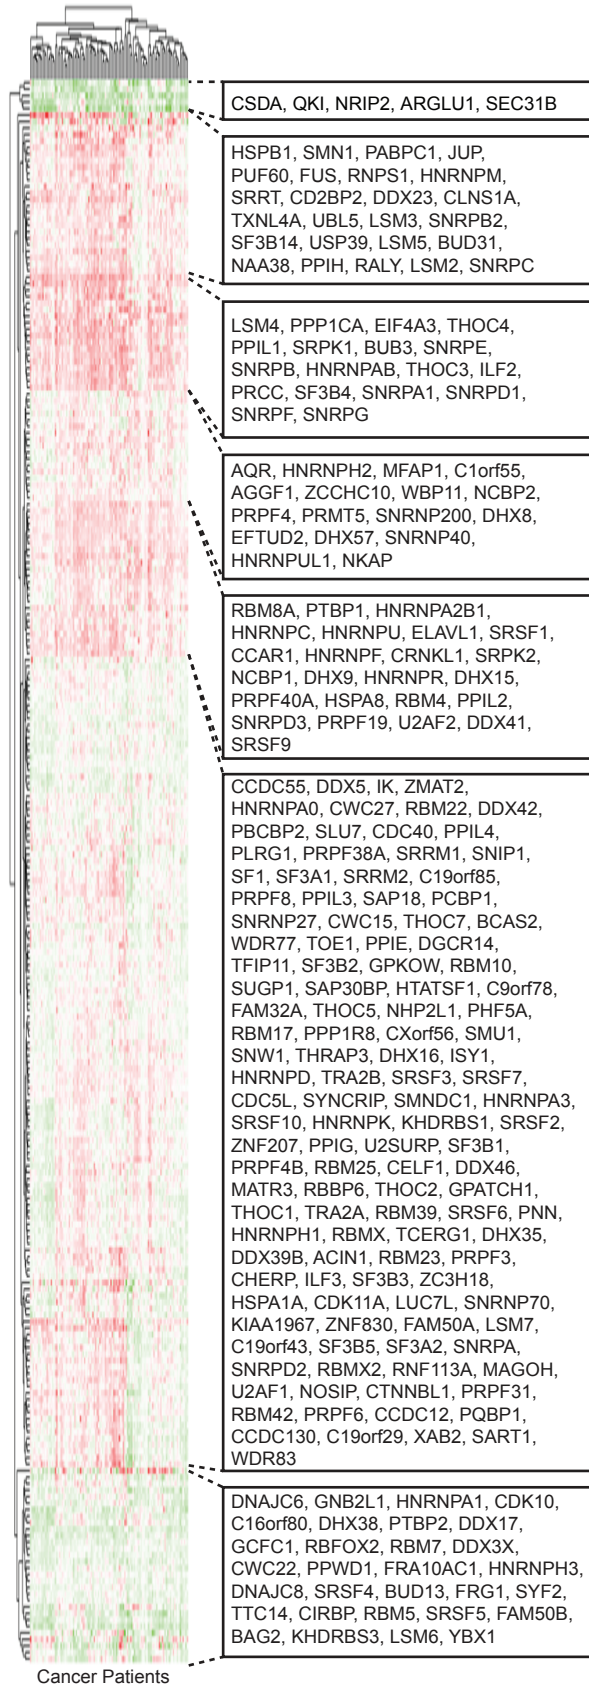

B

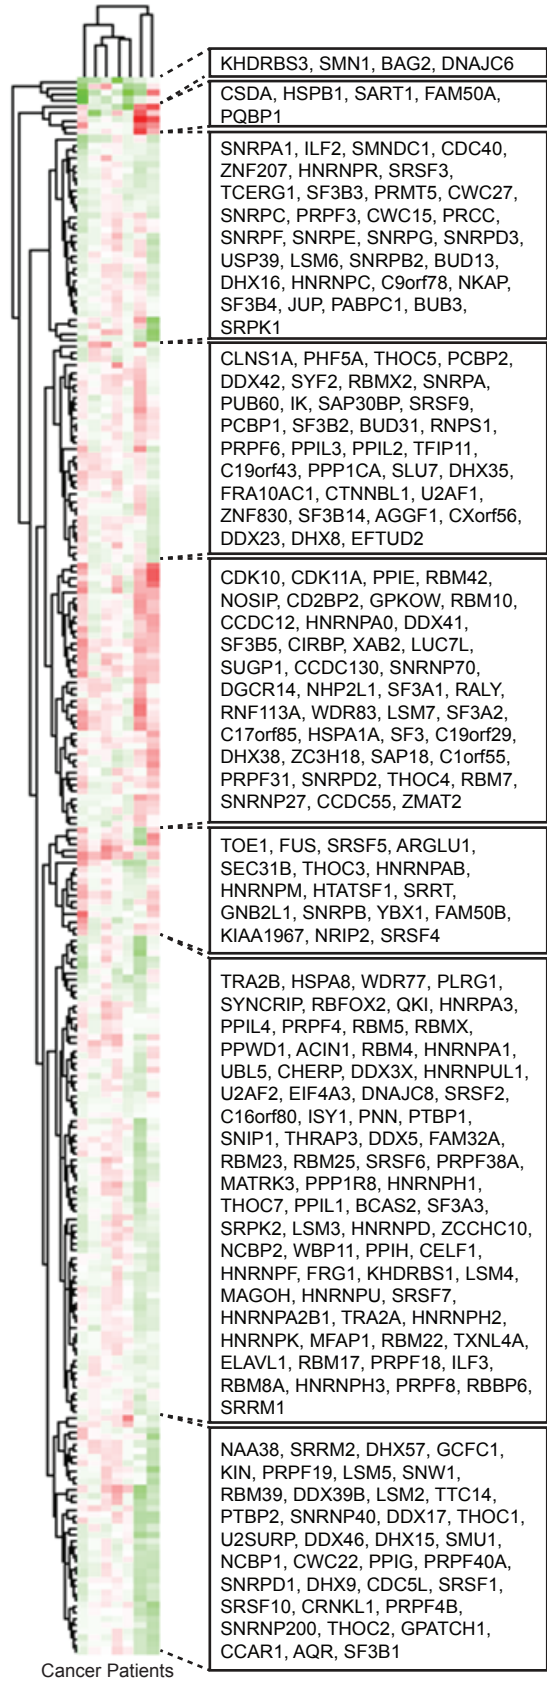

Supplementary Figure 2

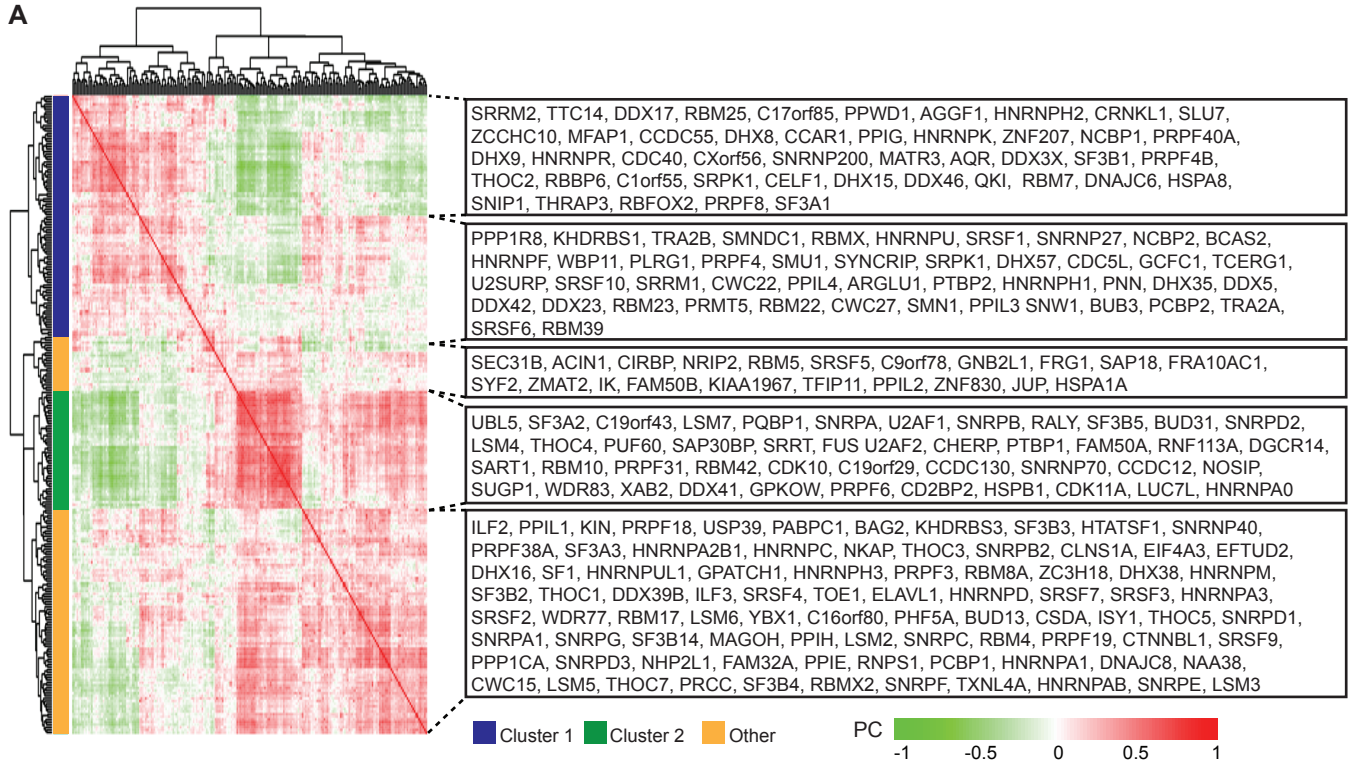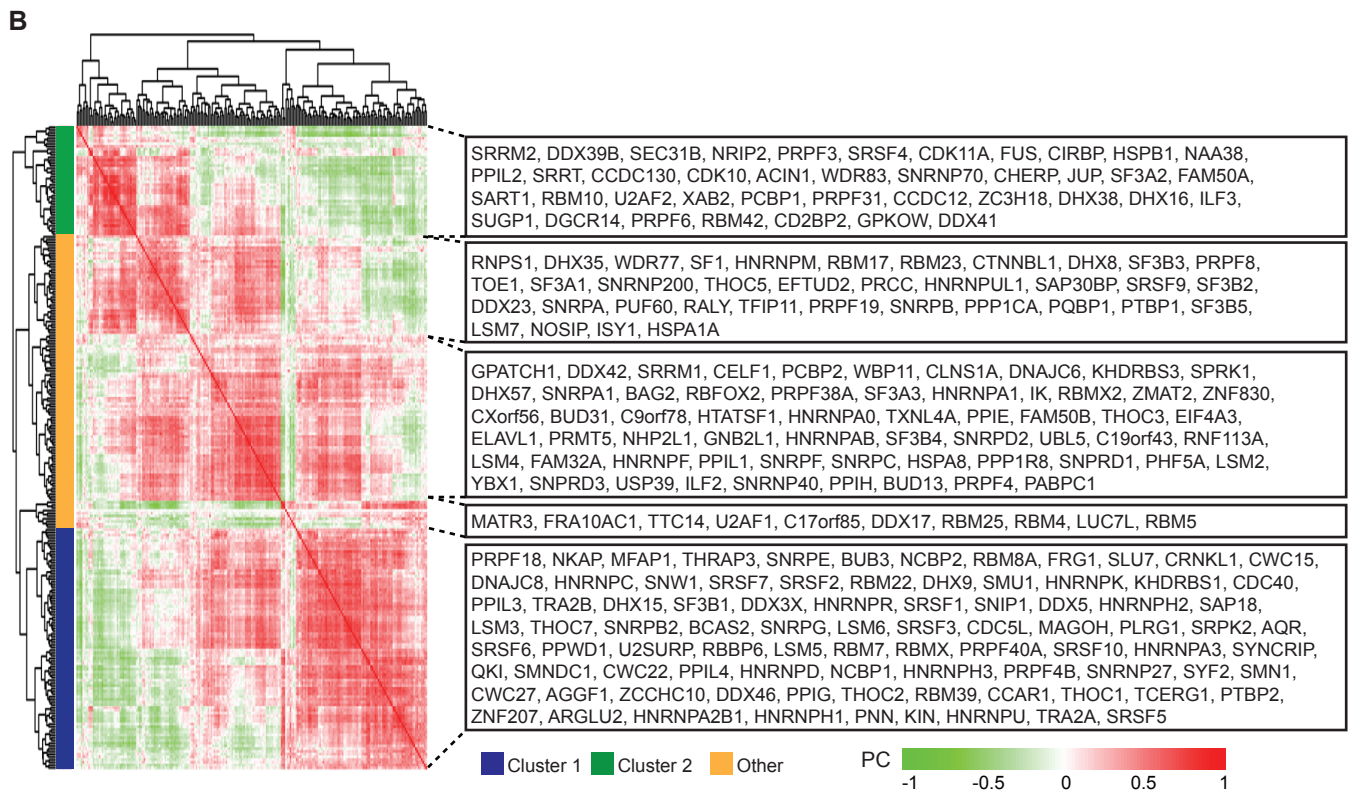



Supplementary Figure 3

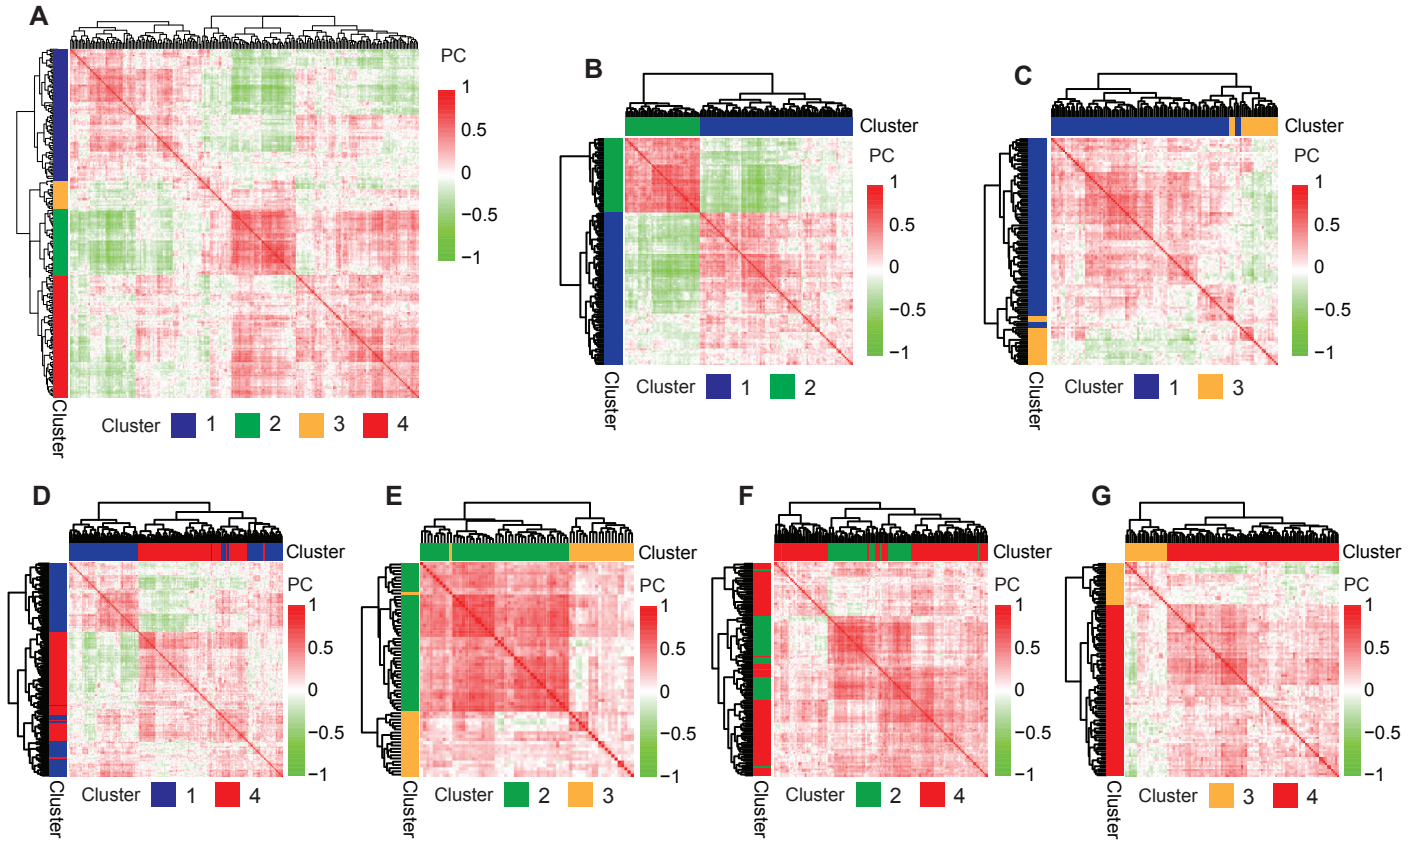

Supplementary Figure 4

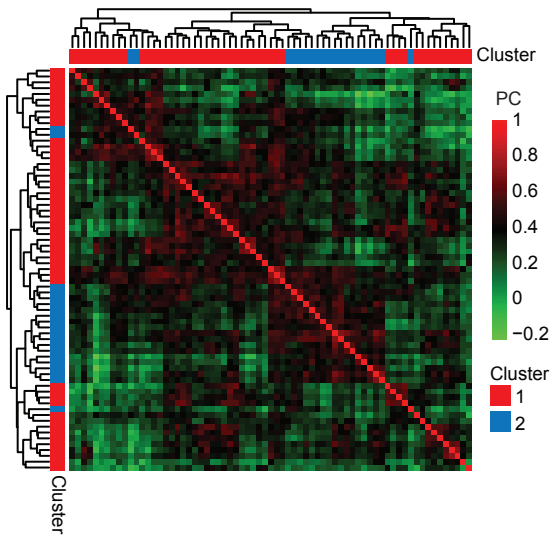

Supplementary Figure 5

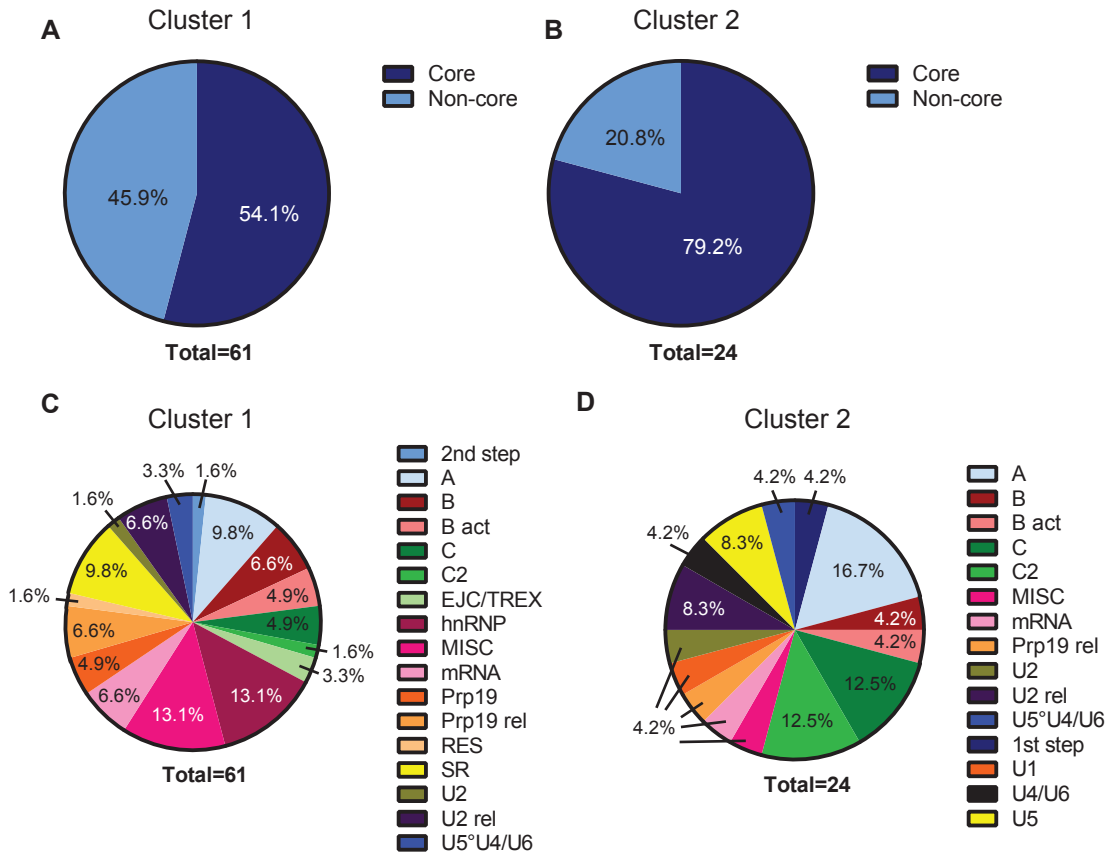



Supplementary Figure 6

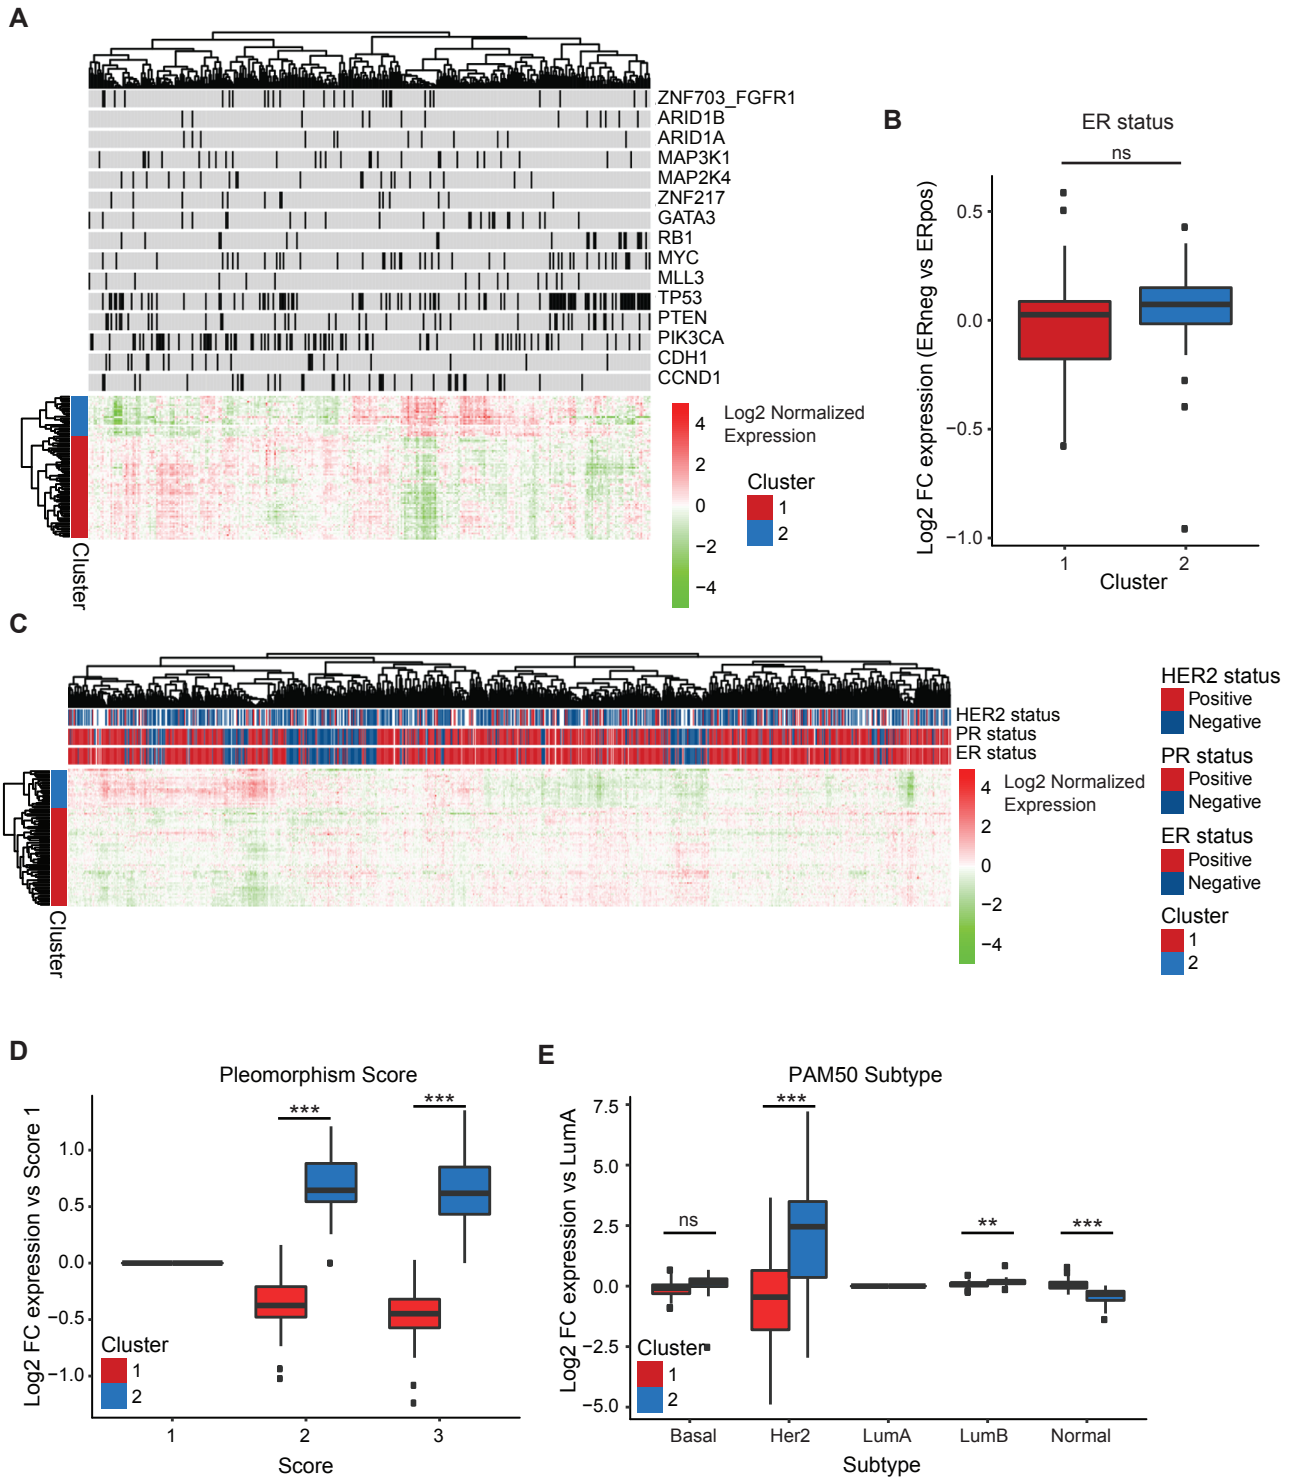



**Supplementary Figure 8**

**A**

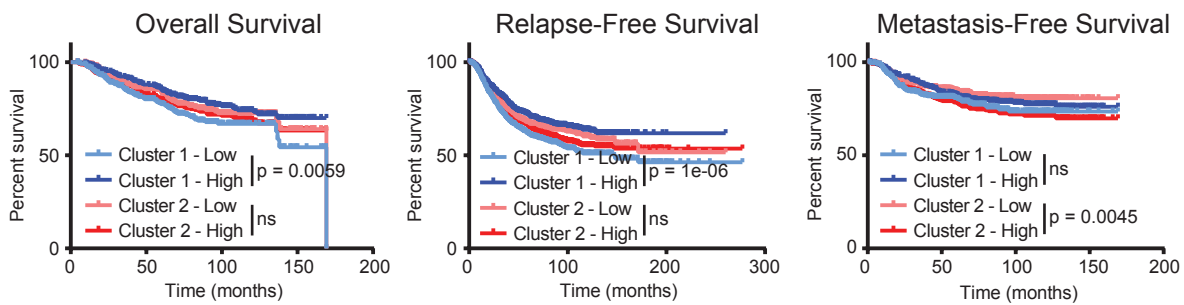

**B**

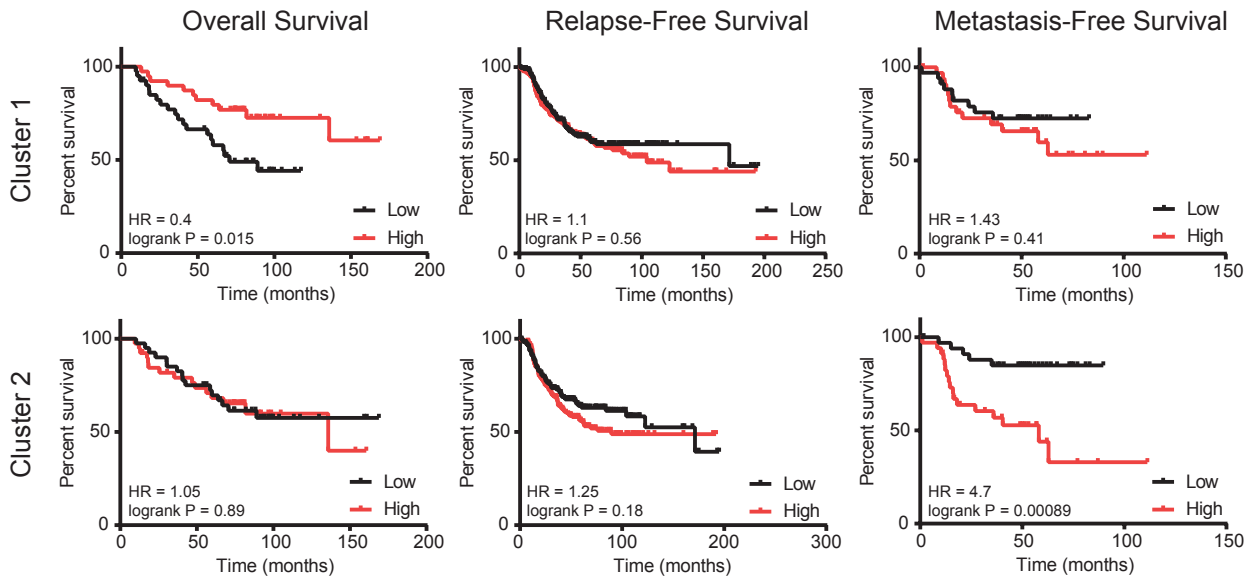

**C**

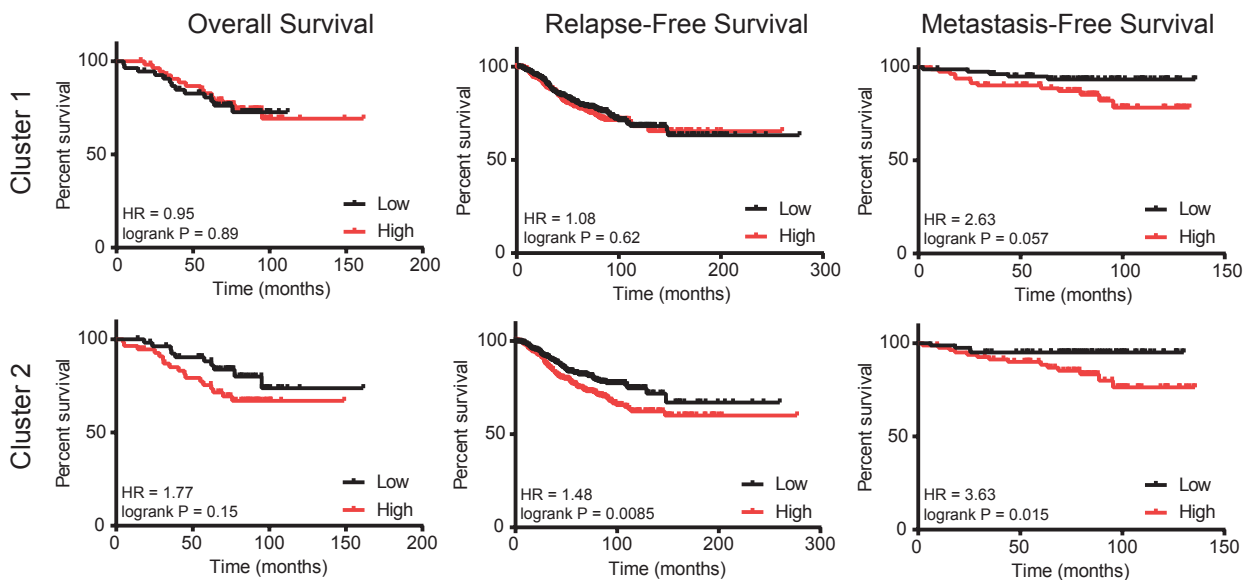

**D**

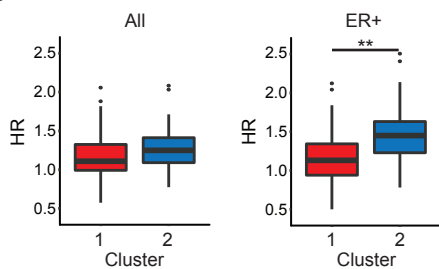

Supplementary Figure 9

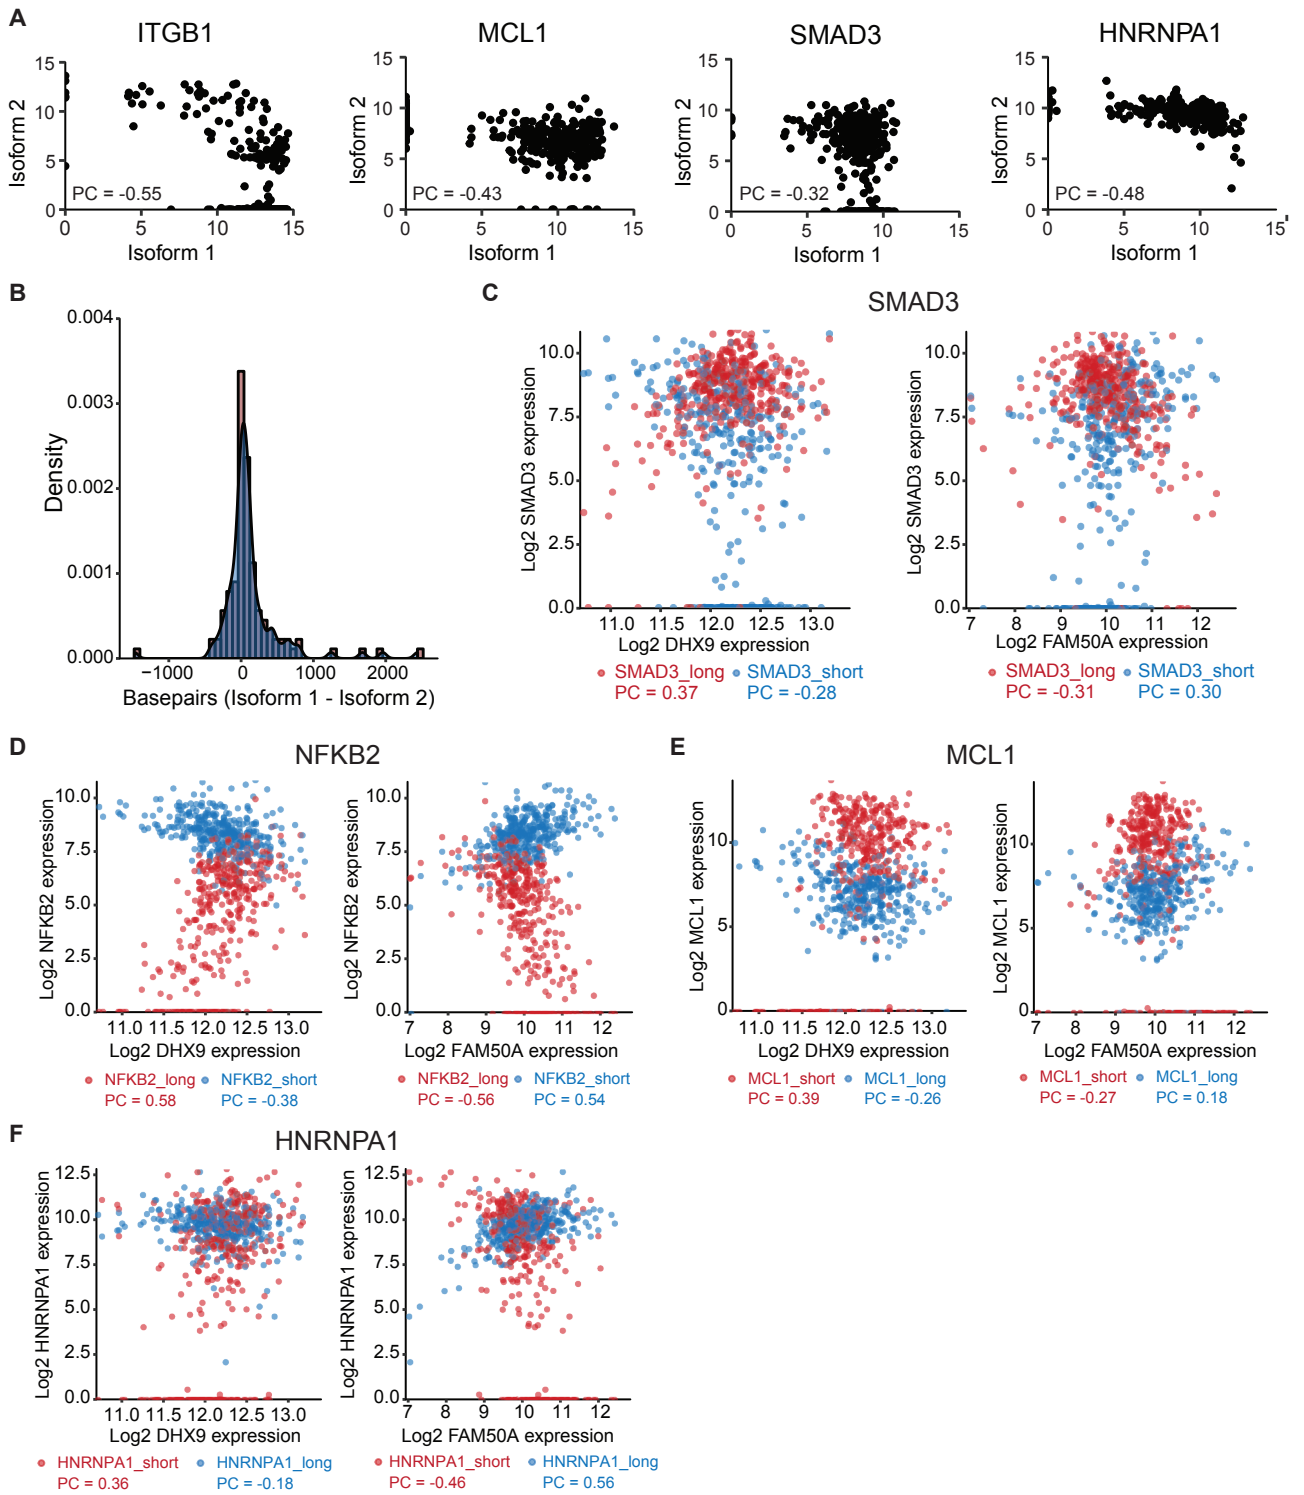

Supplementary Figure 10

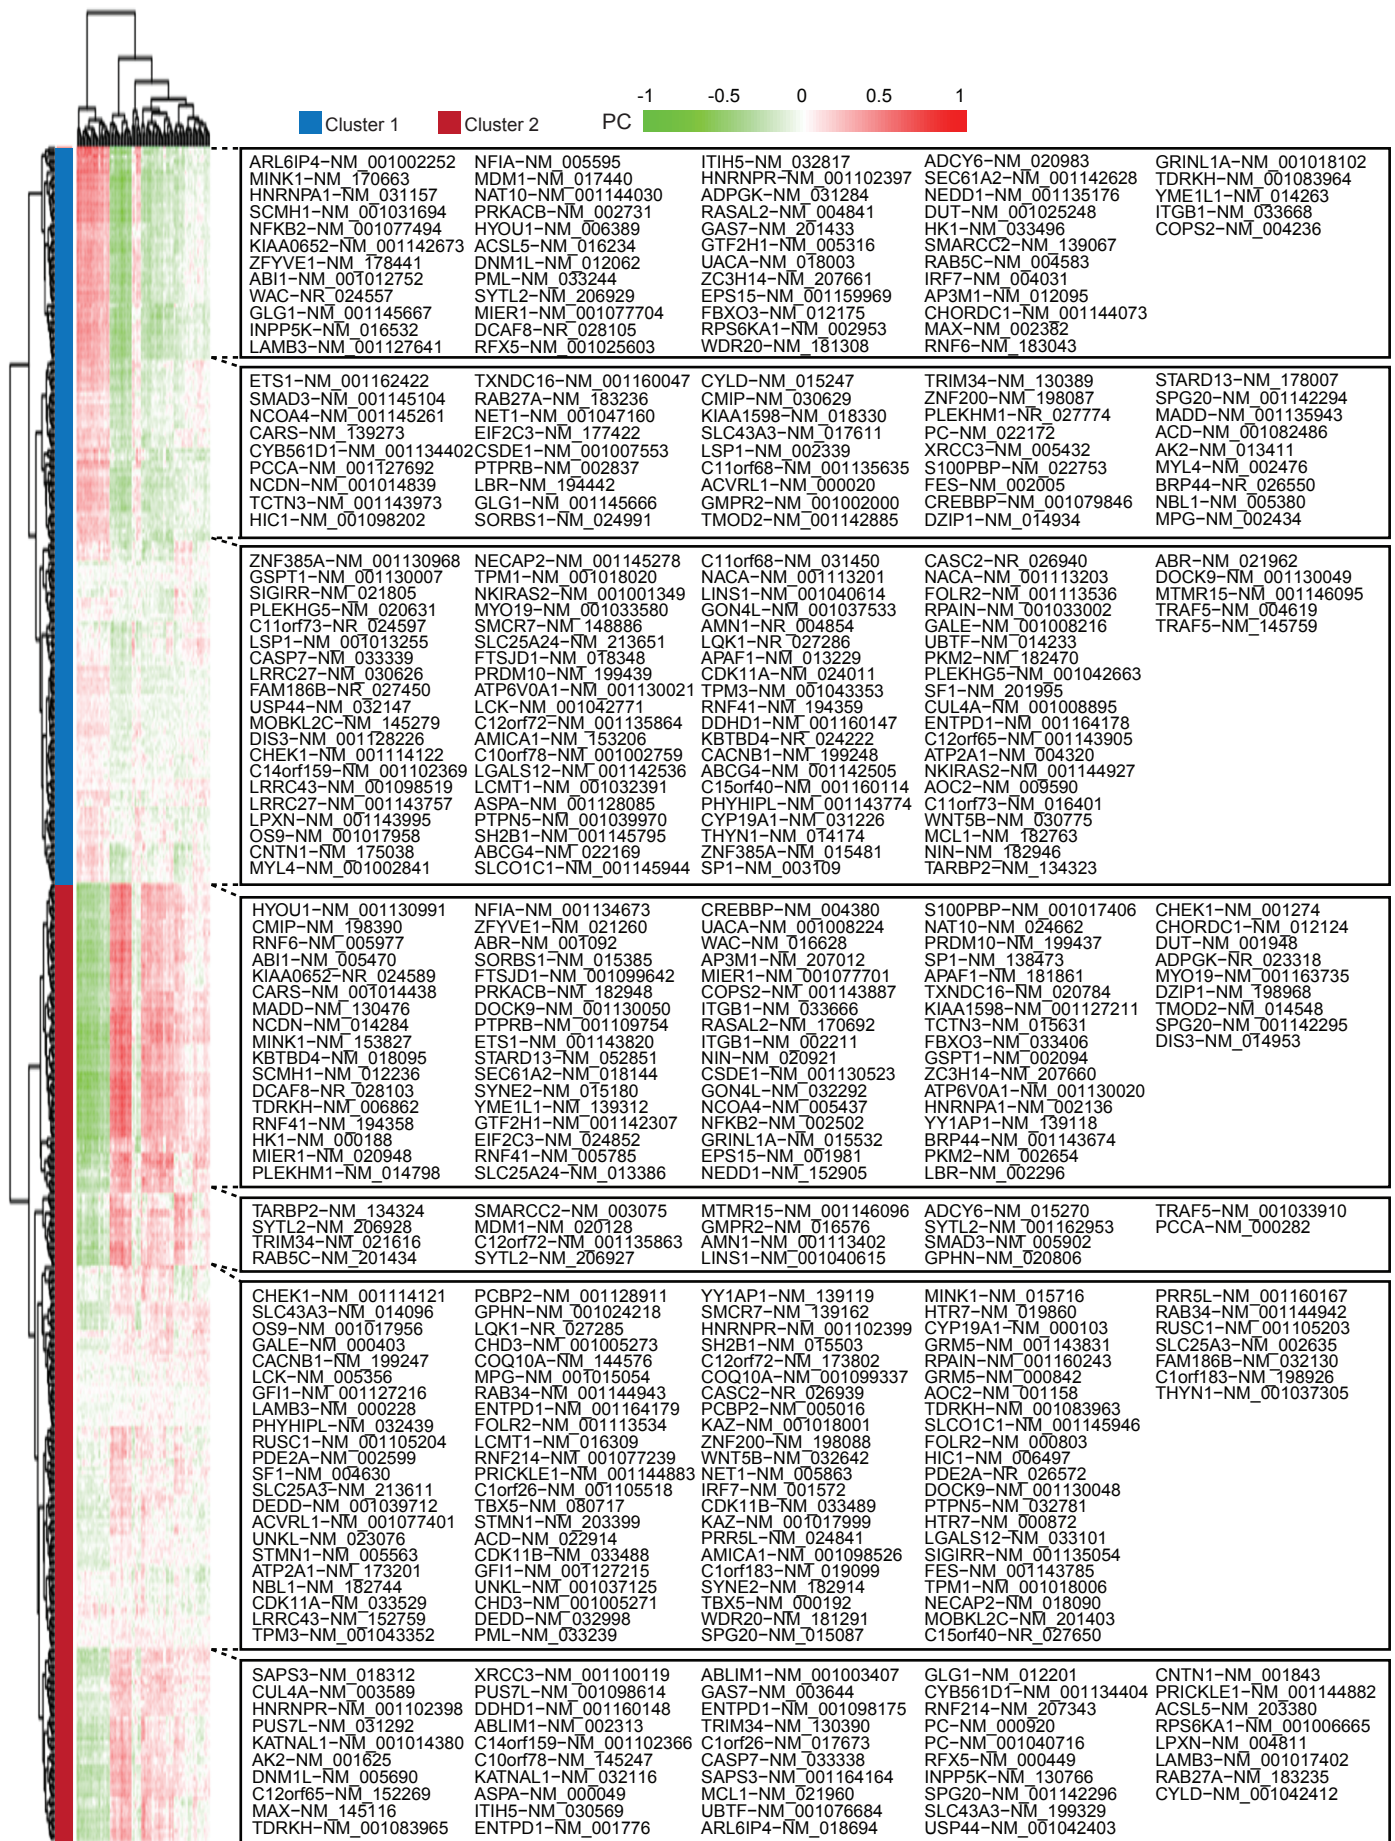

Supplementary Figure 11

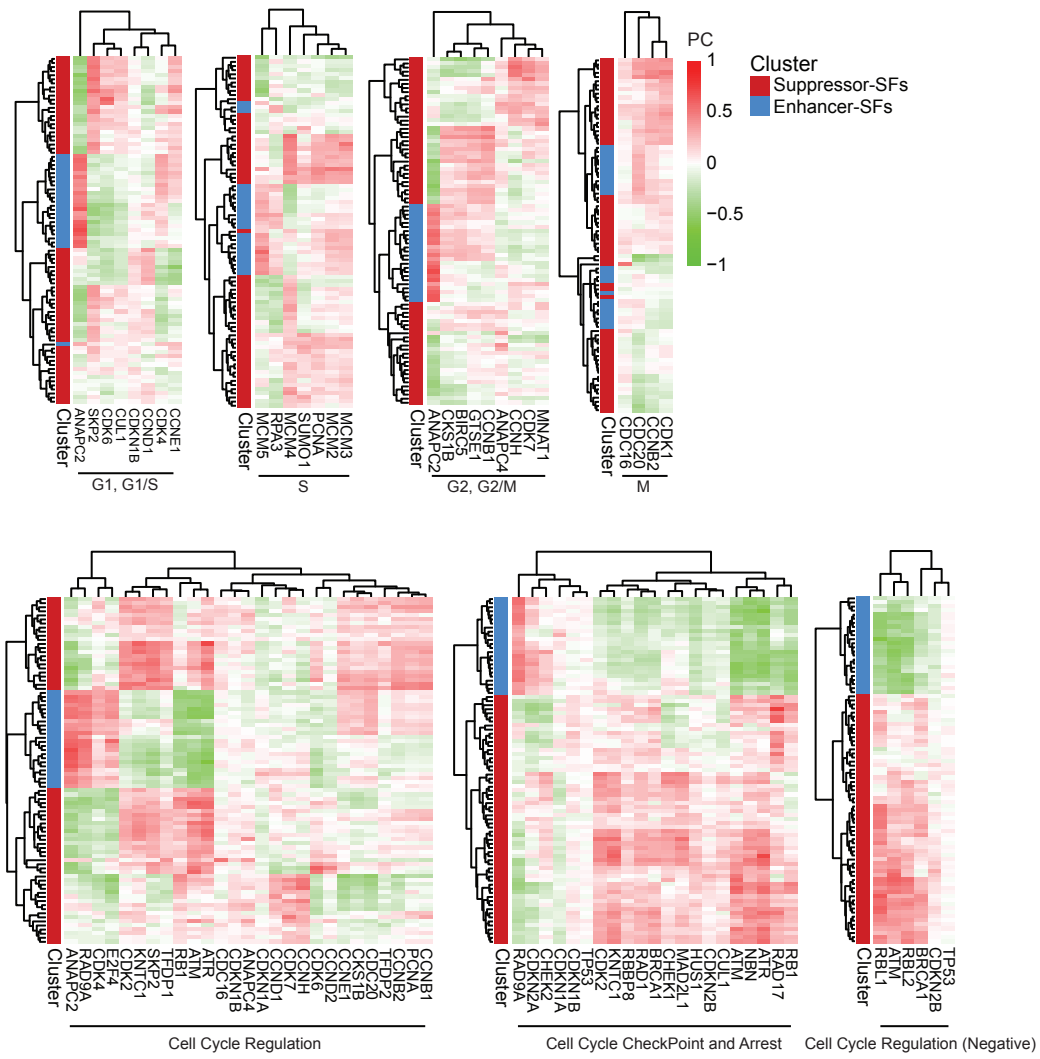





# Supplementary Figure 13

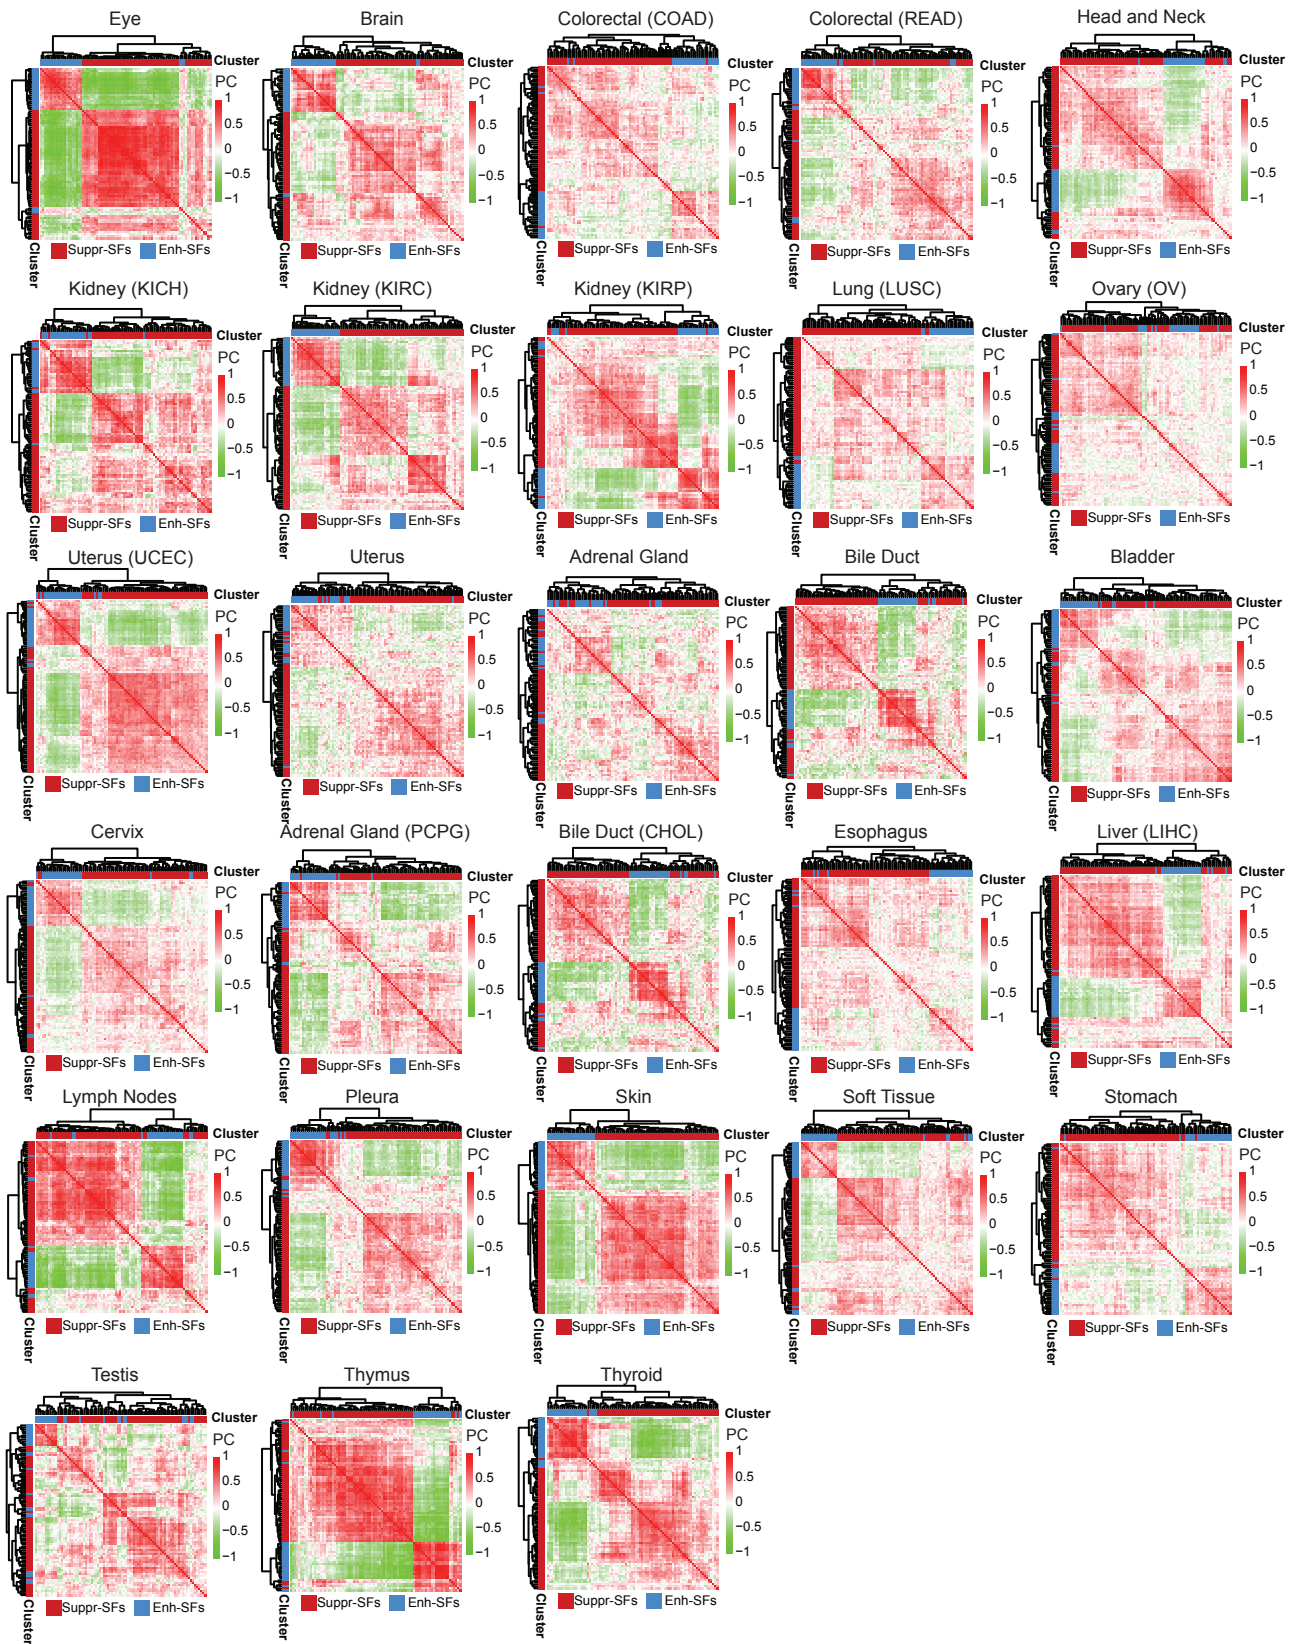



# Supplementary Figure 14

## Mitochondrial translation

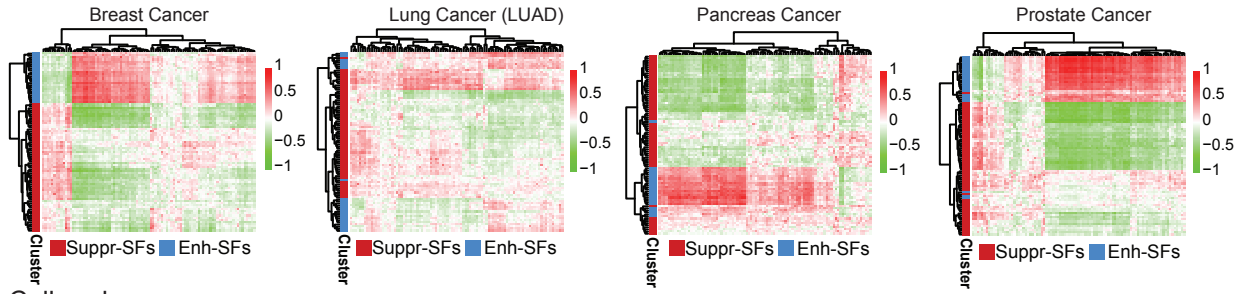

## Cell cycle

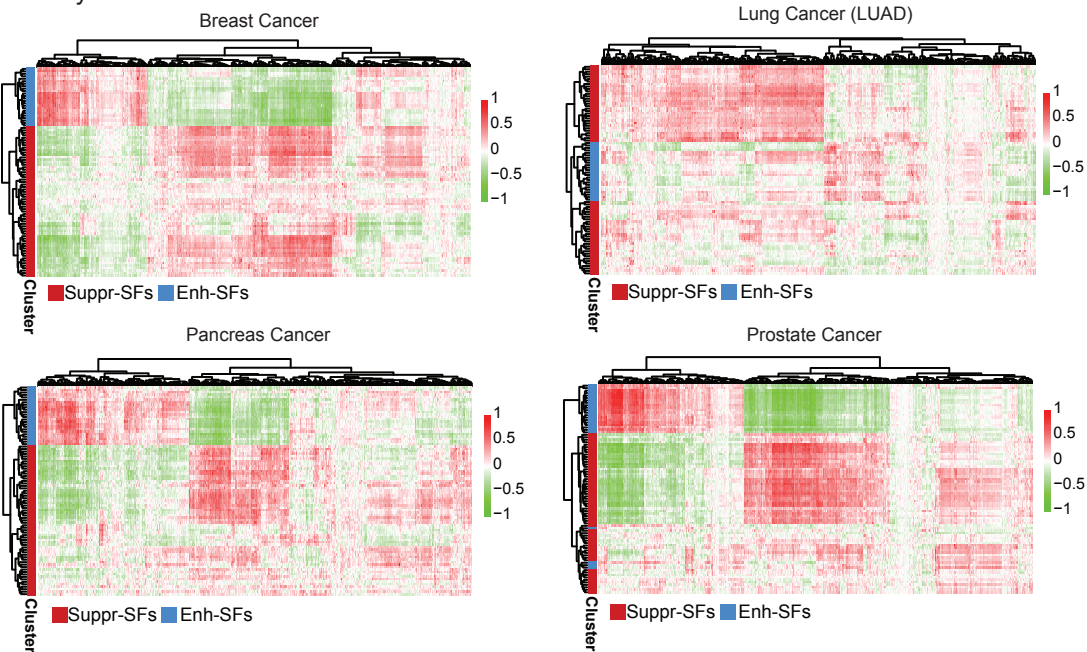

## M phase

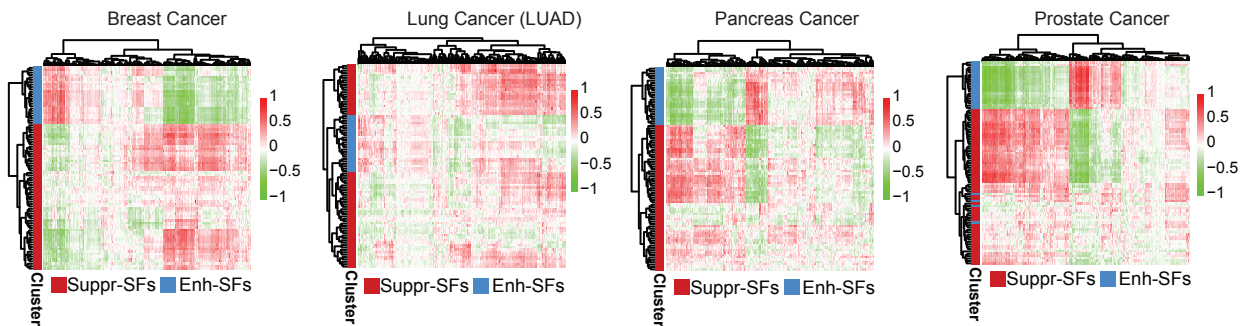

## Respiratory electron transport

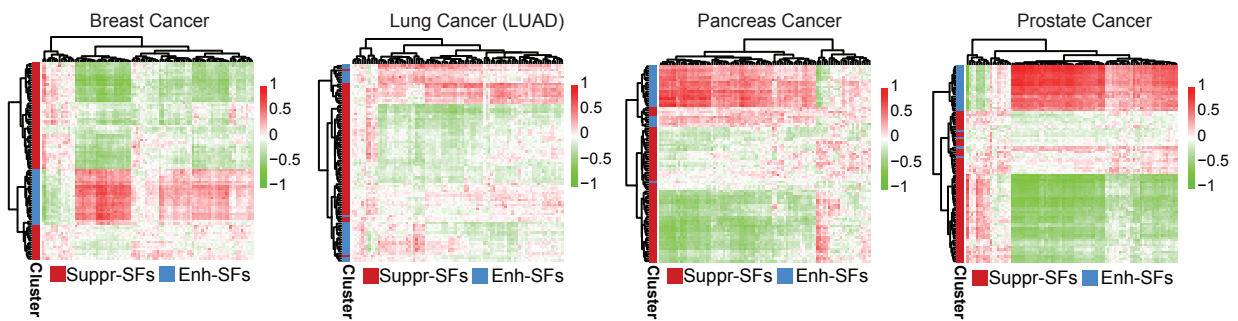

# Supplementary Figure 15

## Ovarian Cancer

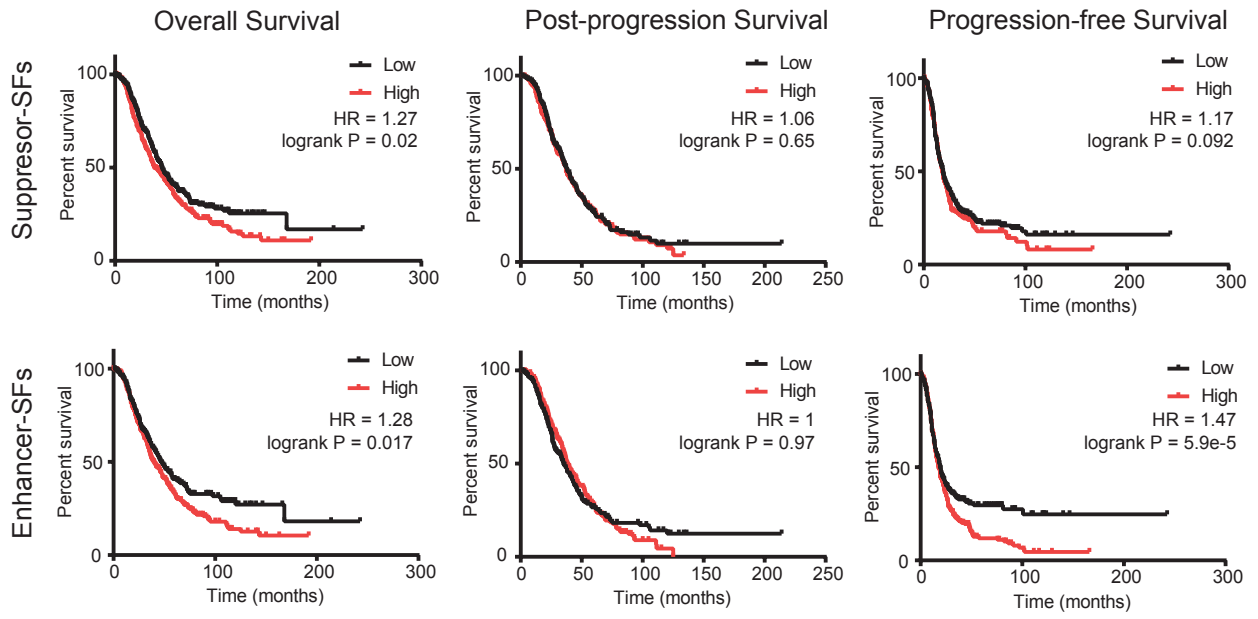

Supplementary Figure 16

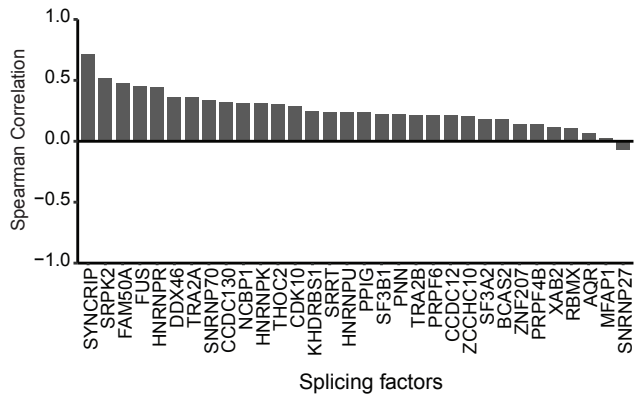

Supplementary Figure 17

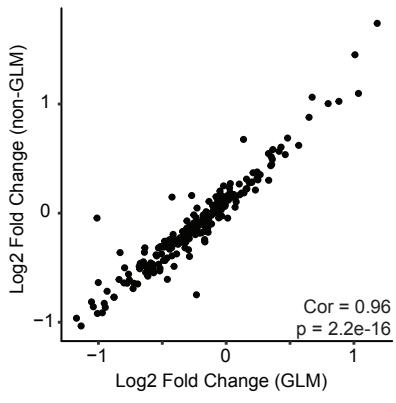

Supplement: 41598_2019_40759_MOESM1_ESM.pdf [file 41598_2019_40759_MOESM1_ESM.pdf]
